# Supplementary material for: Inferring biochemical reactions and metabolite structures to cope with metabolic pathway drift
Source: bioRxiv or medRxiv preprint supplement (doi:10.1101/462556), 2018-12-20
Supplement: Supplementary file [file media-1.pdf]

Table S3

| Usual name                                                     | Category             | MetaCyc ID                        | References                                                                                                    |
|----------------------------------------------------------------|----------------------|-----------------------------------|---------------------------------------------------------------------------------------------------------------|
| dodecanoic acid                                                | 12:0 fatty acid      | DODECANOATE                       | Santos et al., 2015 ; Robertson et al., 2015                                                                  |
| Myristic acid                                                  | 14:0 fatty acid      | CPD-7836                          | Pettitt et al., 1989; Tasende, 2000; Van Ginneken et al., 2011; Robertson et al., 2015 ; Belghit et al., 2017 |
| Pentadecanoic acid                                             | 15:0 fatty acid      | CPD-8462                          | Santos et al., 2015. Belghit et al., 2017                                                                     |
| Palmitic acid                                                  | 16:0 fatty acid      | PALMITATE                         | Pettitt et al., 1989; Tasende, 2000; Van Ginneken et al., 2011; Robertson et al., 2015 ; Belghit et al., 2017 |
| Heptadecanoic acid                                             | 17:0 fatty acid      | CPD-7830                          | Santos et al., 2015                                                                                           |
| Stearic acid                                                   | 18:0 fatty acid      | STEARIC_ACID                      | Tasende et al., 2000 ; Robertson et al., 2015                                                                 |
| Eicosanoic acid                                                | 20:0 fatty acid      | ARACHIDIC_ACID                    | Santos et al., 2015                                                                                           |
| Docosanoic acid                                                | 22:0 fatty acid      | DOCOSANOATE                       | Santos et al., 2015                                                                                           |
| Tricosanoic acid                                               | 23:0 fatty acid      | CPD-7834                          | Santos et al., 2015                                                                                           |
| Tetracosanoic acid                                             | 24:0 fatty acid      | TETRACOSANOATE                    | Santos et al., 2015                                                                                           |
| Palmitoleic acid                                               | 16:1(n-7) fatty acid | CPD-9245                          | Pettitt et al., 1989; Tasende, 2000; Robertson et al., 2015 ; Belghit et al., 2017                            |
| Oleic acid                                                     | 18:1(n-9) fatty acid | OLEATE-CPD                        | Tasende et al., 2000; Van Ginneken et al., 2011; Robertson et al., 2015 ; Belghit et al., 2017                |
| Linoleic acid                                                  | 18:2(n-6) fatty acid | LINOLEIC_ACID                     | Tasende et al., 2000 ; Robertson et al., 2015 ; Belghit et al., 2017                                          |
| Alpha Linolenic acid                                           | 18:3(n-3) fatty acid | LINOLENIC_ACID                    | Tasende et al., 2000                                                                                          |
| γ-linolenic acid                                               | 18:3(n-6) fatty acid | CPD-8117                          | Robertson et al., 2015 ; Belghit et al., 2017                                                                 |
| Octadecatetraenoic acid                                        | 18:4(n-3) fatty acid | CPD-12653                         | Tasende et al., 2000 ; Robertson et al., 2015 ; Belghit et al., 2017                                          |
| Arachidonic acid                                               | 20:4(n-6) fatty acid | ARACHIDONIC_ACID                  | Tasende et al., 2000 ; Banskota et al., 2014 ; Robertson et al., 2015 ; Belghit et al., 2017                  |
| Eicosapentaenoic acid                                          | 20:5(n-3) fatty acid | 5Z8Z11Z14Z17Z-EICOSAPENTAENOATE   | Tasende et al., 2000 ; Banskota et al., 2014 ; Robertson et al., 2015 ; Belghit et al., 2017                  |
| Octanedioic acid                                               | fatty acid           | CPD0-1264                         | Santos et al., 2015                                                                                           |
| Nonanedioic acid                                               | fatty acid           | CPD0-1265                         | Santos et al., 2015                                                                                           |
| Cycloartenol                                                   | sterol               | CYCLOARTENOL                      | Saito and Idler, 1966; Alcaide et al., 1968                                                                   |
| Cholesterol                                                    | sterol               | CHOLESTEROL                       | Saito and Idler, 1966; Tasende et al., 2000 ; Santos et al., 2015                                             |
| 7-Dehydrocholesterol                                           | sterol               | 7-DEHYDROCHOLESTEROL              | Tasende et al., 2000                                                                                          |
| Brassicasterol                                                 | sterol               | BRASSICASTEROL                    | Saito and Idler, 1966 ; Tasende et al., 2000                                                                  |
| Campesterol                                                    | sterol               | CAMPESTEROL                       | Tasende et al., 2000 ; Santos et al., 2015                                                                    |
| 24-Methylenecholesterol                                        | sterol               | 24-METHYLENECHOLESTEROL           | Tasende et al., 2000                                                                                          |
| Sitosterol                                                     | sterol               | SITOSTEROL                        | Saito and Idler, 1966; Tasende et al., 2000 ; Santos et al., 2015                                             |
| Stigmasterol                                                   | sterol               | STIGMASTEROL                      | Tasende et al., 2000                                                                                          |
| 15-keto-prostaglandin E2                                       | oxylipin             | HYDROXY-915-DIOXOPROSTA-13-ENOATE | Gaquerel et al., 2007                                                                                         |
| lutein                                                         | carotenoid           | LUTEIN                            | Banskota et al., 2014                                                                                         |
| Chlorophyll a                                                  | tetrapyrrole         | CHLOROPHYLL-A                     | Melo et al., 2015 ; Robertson et al., 2015                                                                    |
| all-trans-beta-carotene                                        | carotenoid           | CPD1F-129                         | Robertson et al., 2015                                                                                        |
| 9-cis-beta-carotene                                            | carotenoid           | CPD-14646                         | Robertson et al., 2015 ; Belghit et al., 2017                                                                 |
| zeaxanthin                                                     | carotenoid           | CPD1F-130                         | Robertson et al., 2015                                                                                        |
| 2,6,6-trimethyl-1,3-cyclohexadiene-1-carboxaldehyde (safranal) | carotenoid           | CPD-8669                          | Pina et al., 2014                                                                                             |
| Alanine                                                        | aminoacid            | L-ALPHA-ALANINE                   | Young et al., 1958, Belghit et al., 2017                                                                      |
| Arginine                                                       | aminoacid            | ARG                               | Young et al., 1958, Belghit et al., 2017                                                                      |
| Aspartic acid                                                  | aminoacid            | L-ASPARTATE                       | Young et al., 1958, Belghit et al., 2017                                                                      |
| Citrulline                                                     | aminoacid            | L-CITRULLINE                      | Young et al., 1958 ; Belghit et al., 2017                                                                     |
| Cystine                                                        | aminoacid            | CYSTINE                           | Young et al., 1958                                                                                            |
| Glutamic acid                                                  | aminoacid            | GLT                               | Young et al., 1958 ; Belghit et al., 2017                                                                     |
| Glycine                                                        | aminoacid            | GLY                               | Young et al., 1958 ; Belghit et al., 2017                                                                     |
| Histidine                                                      | aminoacid            | HIS                               | Young et al., 1958 ; Belghit et al., 2017                                                                     |
| Isoleucine                                                     | aminoacid            | ILE                               | Young et al., 1958 ; Belghit et al., 2017                                                                     |
| Leucine                                                        | aminoacid            | LEU                               | Young et al., 1958 ; Belghit et al., 2017                                                                     |
| Lysine                                                         | aminoacid            | LYS                               | Young et al., 1958 ; Belghit et al., 2017                                                                     |
| Methionine                                                     | aminoacid            | MET                               | Young et al., 1958 ; Belghit et al., 2017                                                                     |
| Ornithine                                                      | aminoacid            | L-ORNITHINE                       | Young et al., 1958 ; Belghit et al., 2017                                                                     |
| Phenylalanine                                                  | aminoacid            | PHE                               | Young et al., 1958                                                                                            |
| Proline                                                        | aminoacid            | PRO                               | Young et al., 1958 ; Belghit et al., 2017                                                                     |
| Serine                                                         | aminoacid            | SER                               | Young et al., 1958 ; Belghit et al., 2017                                                                     |
| Threonine                                                      | aminoacid            | THR                               | Young et al., 1958 ; Belghit et al., 2017                                                                     |
| Tyrosine                                                       | aminoacid            | TYR                               | Young et al., 1958 ; Belghit et al., 2017                                                                     |

Table S3

|                                   |                               |                  |                                           |
|-----------------------------------|-------------------------------|------------------|-------------------------------------------|
| Valine                            | aminoacid                     | VAL              | Young et al., 1958 ; Belghit et al., 2017 |
| Shinorine                         | Mycosporine-like aminoacid    | CPD-18778        | Kräbs et al., 2004                        |
| UDP- $\alpha$ -D-galactose        | nucleotide sugar              | CPD-14553        | Collén et al., 2014                       |
| i-carrageenose                    | carrageenan                   | Iota-Carrageenan | Matsuhira et al., 1992                    |
| v-carrageenan                     | carrageenan                   | Nu-Carrageenan   | Matsuhira et al., 1992                    |
| Glycerol                          | polyol                        | GLYCEROL         | Santos et al., 2015                       |
| Heptadecane                       | alcane                        | HEPTADECANE-CPD  | Santos et al., 2015                       |
| 6,10,14-Trimethyl-2-pentadecanone | methylketone                  | CPD-7875         | Santos et al., 2015                       |
| Hexadecan-1-ol                    | Long chain aliphatic alcohol  | CPD-348          | Santos et al., 2015                       |
| 9-Octadecan-1-ol                  | Long chain aliphatic alcohol  | CPD-7873         | Santos et al., 2015                       |
| Docosan-1-ol                      | Long chain aliphatic alcohol  | CPD-7845         | Santos et al., 2015                       |
| Octacosan-1-ol                    | Long chain aliphatic alcohol  | CPD-7872         | Santos et al., 2015                       |
| acetaldehyde                      | aldehyde                      | ACETALD          | Pina et al., 2014                         |
| 2-methylpropanal                  | aldehyde                      | BUTANAL          | Pina et al., 2014                         |
| Butanal                           | aldehyde                      | CPD-7031         | Pina et al., 2014                         |
| 3-methylbutanal                   | aldehyde                      | METHYLBUT-CPD    | Pina et al., 2014                         |
| Pentanal                          | aldehyde                      | CPD-9053         | Pina et al., 2014                         |
| Hexanal                           | aldehyde                      | HEXANAL          | Pina et al., 2014                         |
| Benzaldehyde                      | aldehyde                      | BENZALDEHYDE     | Pina et al., 2014                         |
| Ethanol                           | short chain aliphatic alcohol | ETOH             | Pina et al., 2014                         |
| 1-butanol                         | short chain aliphatic alcohol | BUTANOL          | Pina et al., 2014                         |
| 1-pentanol                        | short chain aliphatic alcohol | PENTANOL         | Pina et al., 2014                         |
| 2-butanone                        | short chain ketone            | ACETONE          | Pina et al., 2014                         |
| 3,5-octadien-2-one                | short chain ketone            | MEK              | Pina et al., 2014                         |
| dichloromethane                   | halocarbon                    | CPD-681          | Pina et al., 2014                         |
| chloroform                        | halocarbon                    | CPD-843          | Pina et al., 2014                         |
| 2-methylpropanoic acid            | carboxylic acid               | ACET             | Pina et al., 2014                         |
| 2-methylbutanoic acid             | carboxylic acid               | ISOBUTYRATE      | Pina et al., 2014                         |
| hexane                            | alcane                        | CPD-9288         | Pina et al., 2014                         |
| 2,2,4-trimethylpentane            | alcane                        | CPD-19039        | Pina et al., 2014                         |

Table S4

| Usual name                                                                                        | Category                      | References                                                            |
|---------------------------------------------------------------------------------------------------|-------------------------------|-----------------------------------------------------------------------|
| Heneicosanoic acid                                                                                | 21:0 fatty acid               | Santos et al., 2015                                                   |
| N/A                                                                                               | 15:1 fatty acid               | Robertson et al., 2015                                                |
| N/A                                                                                               | 18:1(n-7) fatty acid          | Robertson et al., 2015                                                |
| 10-nonadecenoate                                                                                  | 19:1(n-9) fatty acid          | Belghit et al., 2017                                                  |
| Eicosadienoic acid                                                                                | 20:2(n-6) fatty acid          | Robertson et al., 2015                                                |
| Eicosatrienoic acid                                                                               | 20:3(n-6) fatty acid          | Robertson et al., 2015                                                |
| Docosadienoate                                                                                    | 22:2(n-6) fatty acid          | Belghit et al., 2017                                                  |
| Octadeca-9-enoic acid                                                                             | fatty acid                    | Santos et al., 2015                                                   |
| 22-Dehydrocholesterol                                                                             | sterol                        | Tasende et al., 2000                                                  |
| 11-hydroxy-octadecadienoic acid (11-HODE)                                                         | oxylipin                      | Gaquereel et al., 2007                                                |
| 13-hydroxy-9Z,11E-octadecadienoic acid (13-HODE)                                                  | oxylipin                      | Gaquereel et al., 2007; Belghit et al., 2017                          |
| 13S-hydroxy-9Z,11E,15Z-octadecatrienoic acid (13-HOTrE)                                           | oxylipin                      | Belghit et al., 2017                                                  |
| 13-oxo-9Z,11E-octadecadienoic acid (13-oxo-ODE)                                                   | oxylipin                      | Gaquereel et al., 2007                                                |
| 13-hydroxyeicosatrienoic acid (13-HETrE)                                                          | oxylipin                      | Gaquereel et al., 2007                                                |
| 13-hydroxyeicosatetraenoic acid (13-HETE)                                                         | oxylipin                      | Gaquereel et al., 2007                                                |
| 13-hydroxyeicosapentaenoic acid (13-HEPE)                                                         | oxylipin                      | Gaquereel et al., 2007                                                |
| 15-hydroxydocosahexaenoic acid (15-HDHE)                                                          | oxylipin                      | Gaquereel et al., 2007                                                |
| 11-hydroxyoctadecadienoic acid (11-HETE)                                                          | oxylipin                      | Gaquereel et al., 2007                                                |
| Hydroxypheophytin a                                                                               | tetrapyrrole                  | Melo et al., 2015                                                     |
| Pheophytin d                                                                                      | tetrapyrrole                  | Melo et al., 2015                                                     |
| Hydroxypheophytin d                                                                               | tetrapyrrole                  | Melo et al., 2015                                                     |
| Monogalactosyldiacylglycerol 2 (MGDG2)                                                            | galactolipid                  | Pettitt et al., 1989                                                  |
| Digalactosyldiacylglycerols (DGDG)                                                                | galactolipid                  | Pettitt et al., 1989                                                  |
| Sulfoquinovosyldiacylglycerol 1 (SQDG1)                                                           | galactolipid                  | Pettitt et al., 1989                                                  |
| Sulfoquinovosyldiacylglycerol 2 (QDG2)                                                            | galactolipid                  | Pettitt et al., 1989                                                  |
| (2S)-1,2-bis-O-eicosapentaenoyl-3-O-β-D-galactopyranosylglycerol                                  | galactolipid                  | Banskota et al., 2014                                                 |
| (2S)-1-O-eicosapentaenoyl-2-O-arachidonoyl-3-O-β-D-galactopyranosylglycerol                       | galactolipid                  | Banskota et al., 2014                                                 |
| (2S)-1-O-(6Z,9Z,12Z,15Z-octadecatetraenoyl)-2-O-palmitoyl-3-O-β-D-galactopyranosylglycerol        | galactolipid                  | Banskota et al., 2014                                                 |
| (2S)-1-O-eicosapentaenoyl-2-O-palmitoyl-3-O-β-D-galactopyranosylglycerol                          | galactolipid                  | Banskota et al., 2014                                                 |
| (2S)-1, 2-bis-O-arachidonoyl-3-O-β-D-galactopyranosylglycerol                                     | galactolipid                  | Banskota et al., 2014                                                 |
| (2S)-1-O-arachidonoyl-2-O-palmitoyl-3-O-β-D-galactopyranosylglycerol                              | galactolipid                  | Banskota et al., 2014                                                 |
| (2S)-1-O-eicosapentaenoyl-2-O-palmitoyl-3-O-β-D-galactopyranosyl-6-1α-D-galactopyranosyl-glycerol | galactolipid                  | Banskota et al., 2014                                                 |
| (2S)-1-O-arachidonoyl-2-O-palmitoyl-3-O-β-D-galactopyranosyl-6-1α-D-galactopyranosyl-glycerol     | galactolipid                  | Banskota et al., 2014                                                 |
| diphosphatidylglycerol, phosphatidic acid                                                         | DPG/PA                        | Pettitt et al., 1989                                                  |
| l-citrullinyl-l-arginine                                                                          | aminoacid                     | Laycock et al., 1977                                                  |
| Gigartinine                                                                                       | aminoacid                     | Laycock et al., 1977                                                  |
| Amide N                                                                                           | aminoacid                     | Young et al., 1958                                                    |
| Asterina-330                                                                                      | Mycosporine-like aminoacid    | Athukorala et al., 2016; Guihéneuf et al., 2018                       |
| MAA1                                                                                              | Mycosporine-like aminoacid    | This study                                                            |
| MAA2                                                                                              | Mycosporine-like aminoacid    | This study                                                            |
| Palythine                                                                                         | Mycosporine-like aminoacid    | Karsten et al., 1998; Athukorala et al., 2016; Guihéneuf et al., 2018 |
| Palythene                                                                                         | Mycosporine-like aminoacid    | Karsten et al., 1998                                                  |
| Palythinol                                                                                        | Mycosporine-like aminoacid    | Karsten et al., 1998; Athukorala et al., 2016                         |
| Isofloridoside                                                                                    | heteroside                    | Kremer et al., 1982                                                   |
| 1-Monohexadecanoin                                                                                | Long chain aliphatic alcohol  | Santos et al., 2015                                                   |
| Tetradecan-1-ol                                                                                   | Long chain aliphatic alcohol  | Santos et al., 2015                                                   |
| Octadecan-1-ol                                                                                    | Long chain aliphatic alcohol  | Santos et al., 2015                                                   |
| 1-penten-3-ol                                                                                     | short chain aliphatic alcohol | Pina et al., 2014                                                     |
| 2(Z)-penten-1ol                                                                                   | short chain aliphatic alcohol | Pina et al., 2014                                                     |
| 3-methylbutanoic acid                                                                             | carboxylic acid               | Pina et al., 2014                                                     |
| 2-methylbutanal                                                                                   | aldehyde                      | Pina et al., 2014                                                     |
| 1-octen-3-ol                                                                                      | short chain aliphatic alcohol | Pina et al., 2014                                                     |

## Table S4

|                        |                    |                   |
|------------------------|--------------------|-------------------|
| 2,6-dimethylpyrazine   | short chain ketone | Pina et al., 2014 |
| 2-propanone            | short chain ketone | Pina et al., 2014 |
| acetic acid, anhydride | carboxylic acid    | Pina et al., 2014 |
| 2,2,3-trimethylpentane | alcane             | Pina et al., 2014 |
| tetradecane            | alcane             | Pina et al., 2014 |
