# Supplementary material for: Inferring biochemical reactions and metabolite structures to cope with metabolic pathway drift
Source: bioRxiv or medRxiv preprint supplement (doi:10.1101/462556), 2018-12-20
Supplement: Supplementary file [file media-2.pdf]

**Supplementary Information for**

**Inferring biochemical reactions and metabolite structures  
to cope with metabolic pathway drift**

Arnaud Belcour, Jean Girard, Méziane Aite, Ludovic Delage, Camille Trottier, Charlotte Marteau, Cédric Leroux, Simon M. Dittami, Pierre Sauleau,  
Erwan Corre, Jacques Nicolas, Catherine Boyen, Catherine Leblanc, Jonas Collén, Anne Siegel, Gabriel V. Markov

correspondence to : [gabriel.markov@sb-roscoff.fr](mailto:gabriel.markov@sb-roscoff.fr)

**This file includes:**

Figures S1 to S6  
Table S1 to S2  
Supplementary dataset

**Other supplementary material for this manuscript includes the following:**

Tables S3 to S4 (separate pdf, content will be submitted to the Metabolights database)

| <b>Analysed compounds</b> | <b>Molecular weight<br/>(g.mol<sup>-1</sup>)</b> | <b>RT<br/>(min)</b> | <b>m/z [M+H]<sup>+</sup><br/>(TMS)</b> |
|---------------------------|--------------------------------------------------|---------------------|----------------------------------------|
| brassicasterol            | 398.66                                           | 25.5                | 470                                    |
| campesterol               | 400.68                                           | 26.6                | 472                                    |
| 5 $\alpha$ -cholestane    | 372.67                                           | 20.3                | 372                                    |
| cholesterol               | 386.65                                           | 24.7                | 458                                    |
| cycloartanol              | 428.75                                           | 30.5                | 500                                    |
| cycloartenol              | 426.72                                           | 29.0                | 498                                    |
| cycloeucalenol            | 426.73                                           | 30.4                | 498                                    |
| 7-dehydrocholesterol      | 384.63                                           | 25.6                | 456                                    |
| desmosterol               | 384.64                                           | 25.5                | 456                                    |
| ergosterol                | 396.65                                           | 26.2                | 468                                    |
| fucosterol                | 412.69                                           | 28.2                | 484                                    |
| lanosterol                | 426.39                                           | 27.8                | 498                                    |
| lathosterol               | 386.65                                           | 25.8                | 458                                    |
| $\beta$ -sitosterol       | 414.39                                           | 28.0                | 486                                    |
| squalene                  | 410.72                                           | 19.8                | 482                                    |
| stigmasterol              | 412.69                                           | 27.0                | 484                                    |
| Zymosterol                | 384.64                                           | 25.9                | 456                                    |

**Supp. Table 3. Retention times and m/z ratio for analytical standards of sterols on a 7890-5975C Agilent GC-MS.**

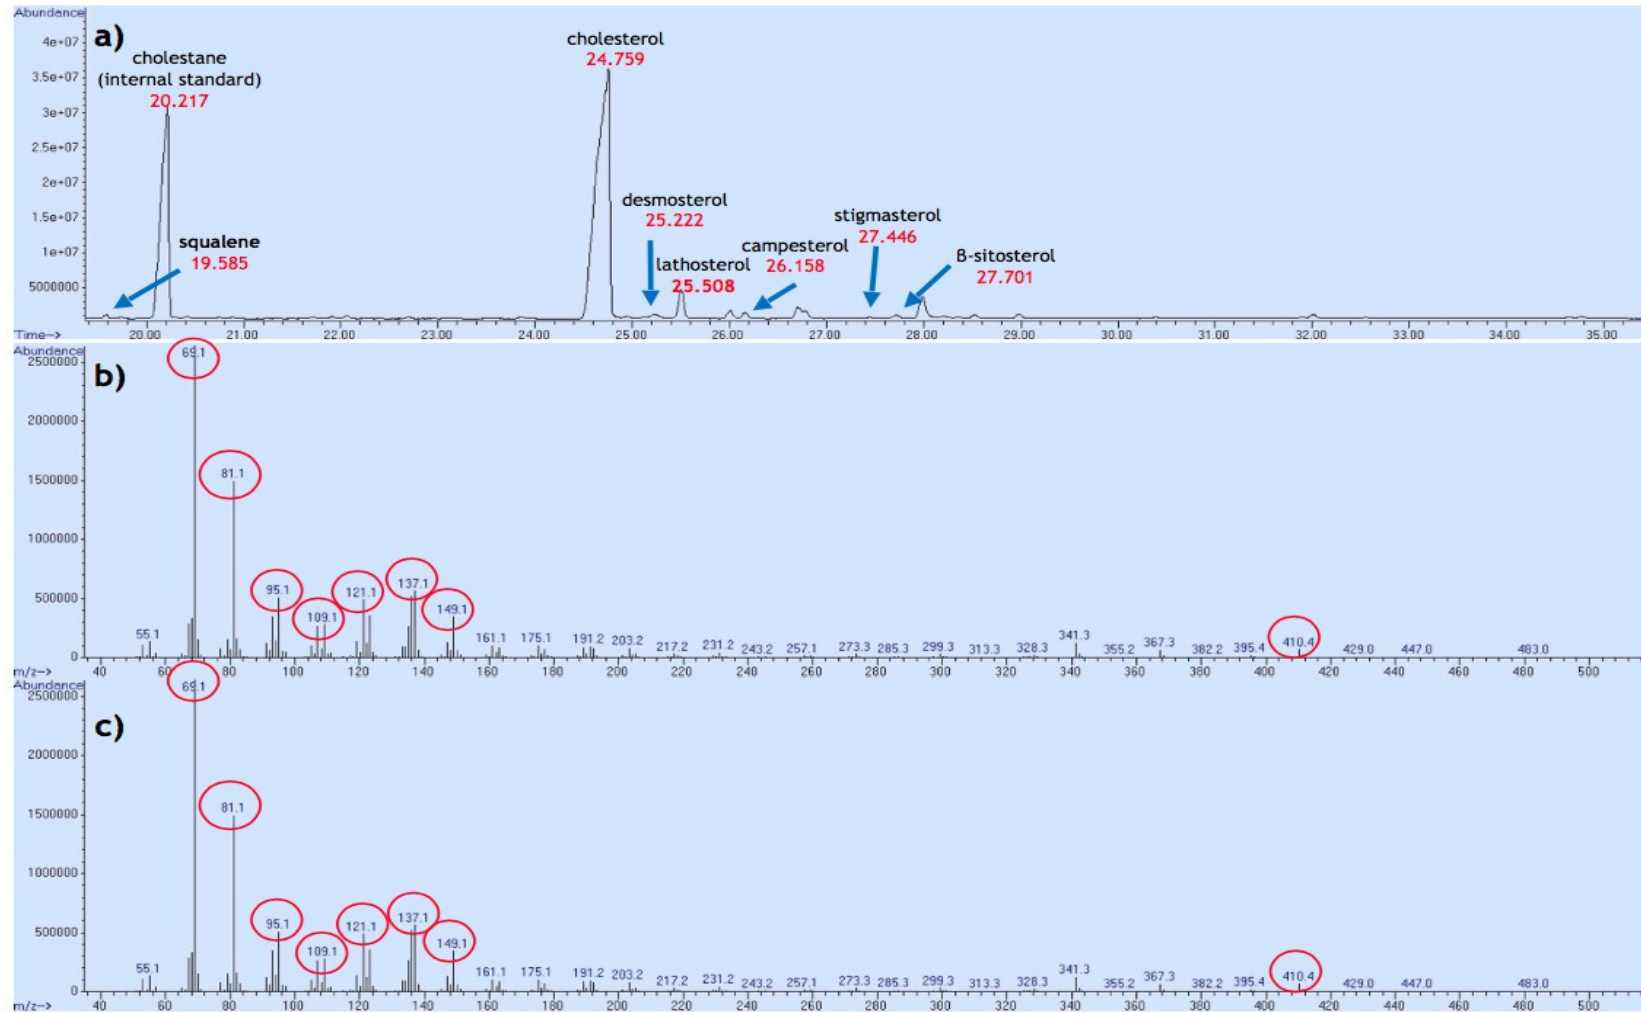

**Supp. Figure 1. Identification of squalene in *C. crispus*.** a) Total Ion Chromatogram (TIC) from *C. crispus* extract. b) MS spectrum of squalene in *C. crispus* extract. c) MS spectrum of the squalene analytical standard. Main fragmentation peaks identical in both spectra are highlighted in red circles.

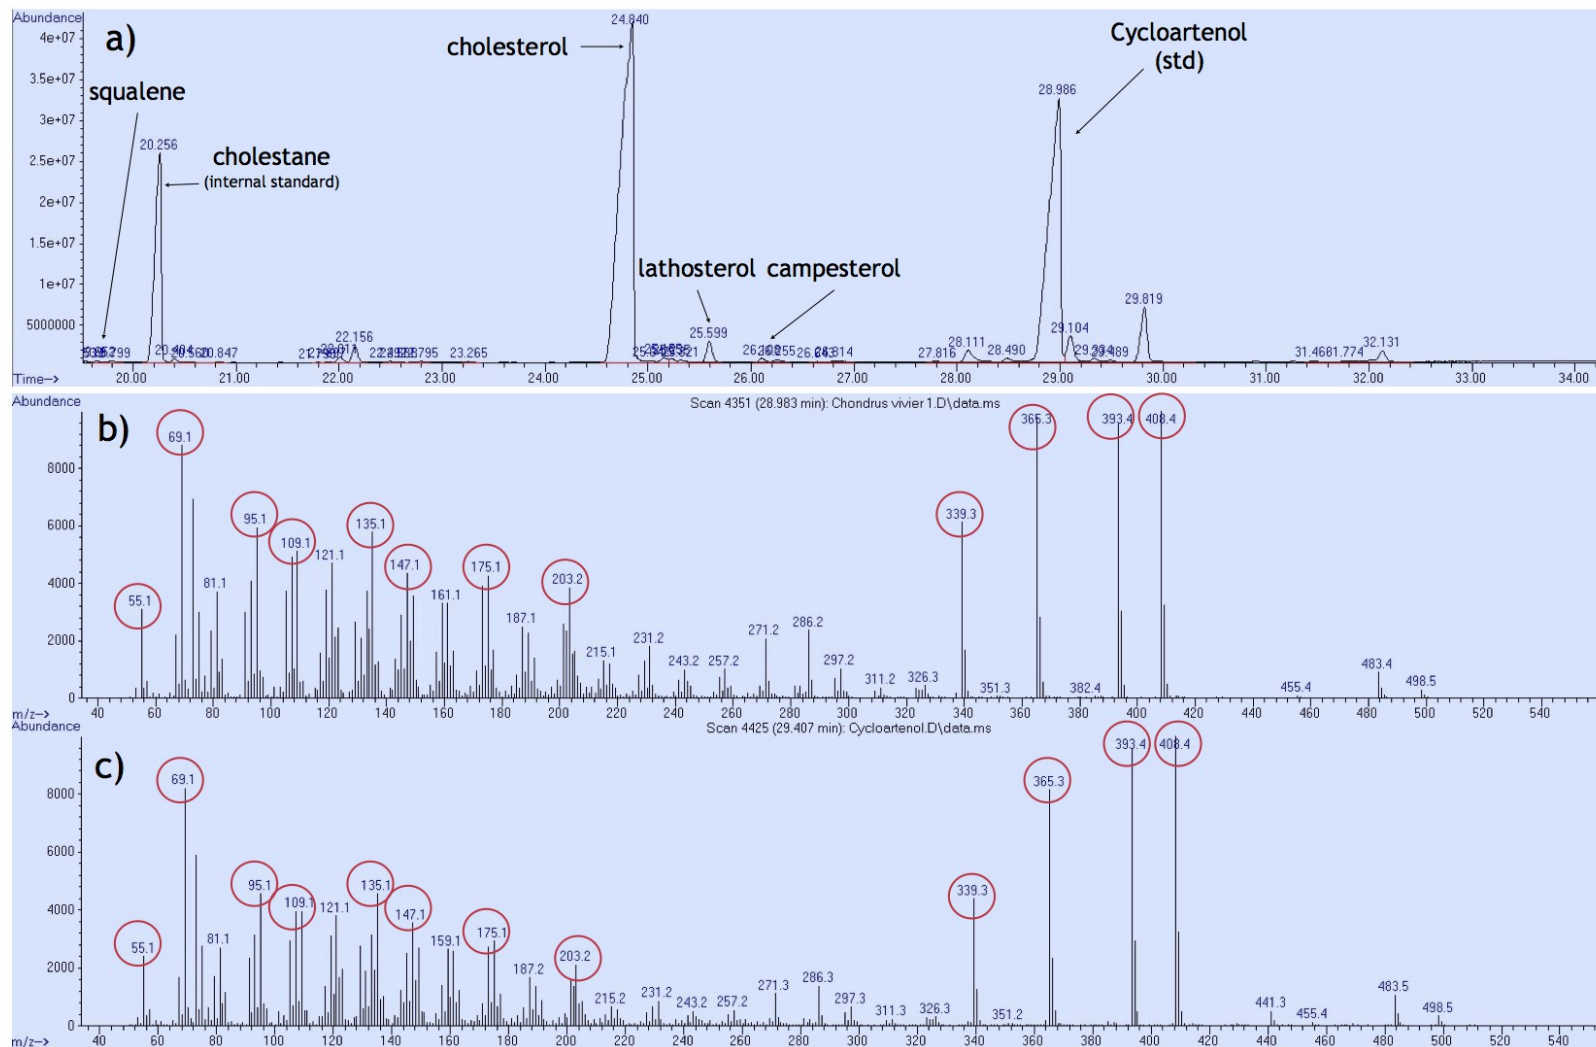

**Supp Figure 2. Control for technical detectability of cycloartenol in spiked *Chondrus crispus* extract.**

a) TIC from *Chondrus crispus* extract incubated with cycloartenol. b) MS spectrum of cycloartenol standard incorporated in *C. crispus* extract. c) MS spectrum of cycloartenol standard alone. Main fragmentation peaks identical in both spectra are highlighted in red circles.

| MAAs                            | Palythine | Mycosporine-glycine | MAA1     | Isujirene/Palythene | Asterina-330 | Palythinol<br>or MAA2 | Shinorine | Porphyra-334 |
|---------------------------------|-----------|---------------------|----------|---------------------|--------------|-----------------------|-----------|--------------|
| Rt (min.)                       | 8.3       | 20.0                | 10.8     | 19.3                | 8.7          | 10.1                  | 18.5      | 19.5         |
| m/z [M+H] <sup>+</sup> observed | 245.1090  | 246.0932            | 271.1241 | 285.1401            | 289.1349     | 303.1497              | 333.1245  | 347.1399     |
| m/z calculated                  | 245.1132  | 246.0972            | 271.1288 | 285.1445            | 289.1394     | 303.1551              | 333.1292  | 347.1449     |
| EIC (Intens. x108)              |           |                     |          |                     |              |                       |           |              |
| <i>C. crispus</i> (April)       | 16118542  | 707375              | 3254803  | 209911              | 5116637      | 26945                 | 3129533   | 353130       |
| <i>C. crispus</i> (July)        | 12600749  | 85700               | 928894   | 36714               | 3788544      | 18560                 | 394887    | 11021        |
| <i>C. crispus</i> (August)      | 16469850  | 219296              | 857212   | 238033              | 5653618      | 32998                 | 1063642   | 83569        |
| <i>C. crispus</i> (Sept.)       | 11230824  | 56477               | 2546286  | 77636               | 2917730      | < LOD                 | 5199737   | 33580        |
| UV (mAU)                        |           |                     |          |                     |              |                       |           |              |
| <i>C. crispus</i> (April)       | 20420     | 31,525              | 1541     | < LOD               | 6996         | < LOD                 | 2299      | 117          |
| <i>C. crispus</i> (July)        | 14578     | 171,83              | 1487     | < LOD               | 7106         | 327,43                | 335       | < LOD        |
| <i>C. crispus</i> (August)      | 19005     | 242,7               | 2143     | < LOD               | 9927         | 707,57                | 1245      | 248          |
| <i>C. crispus</i> (Sept.)       | 12768     | < LOD               | 989      | < LOD               | 6367         | < LOD                 | 5128      | 136          |

**Supp. Table 4. MAAs composition in *Chondrus crispus* by LC-UV-HRMS. Extracted Ion Chromatogramm (EIC) of selected MMAs were obtained in positive mode; UV Absorbance was recorded at 330 nm (LOD = Limit Of Detection).**

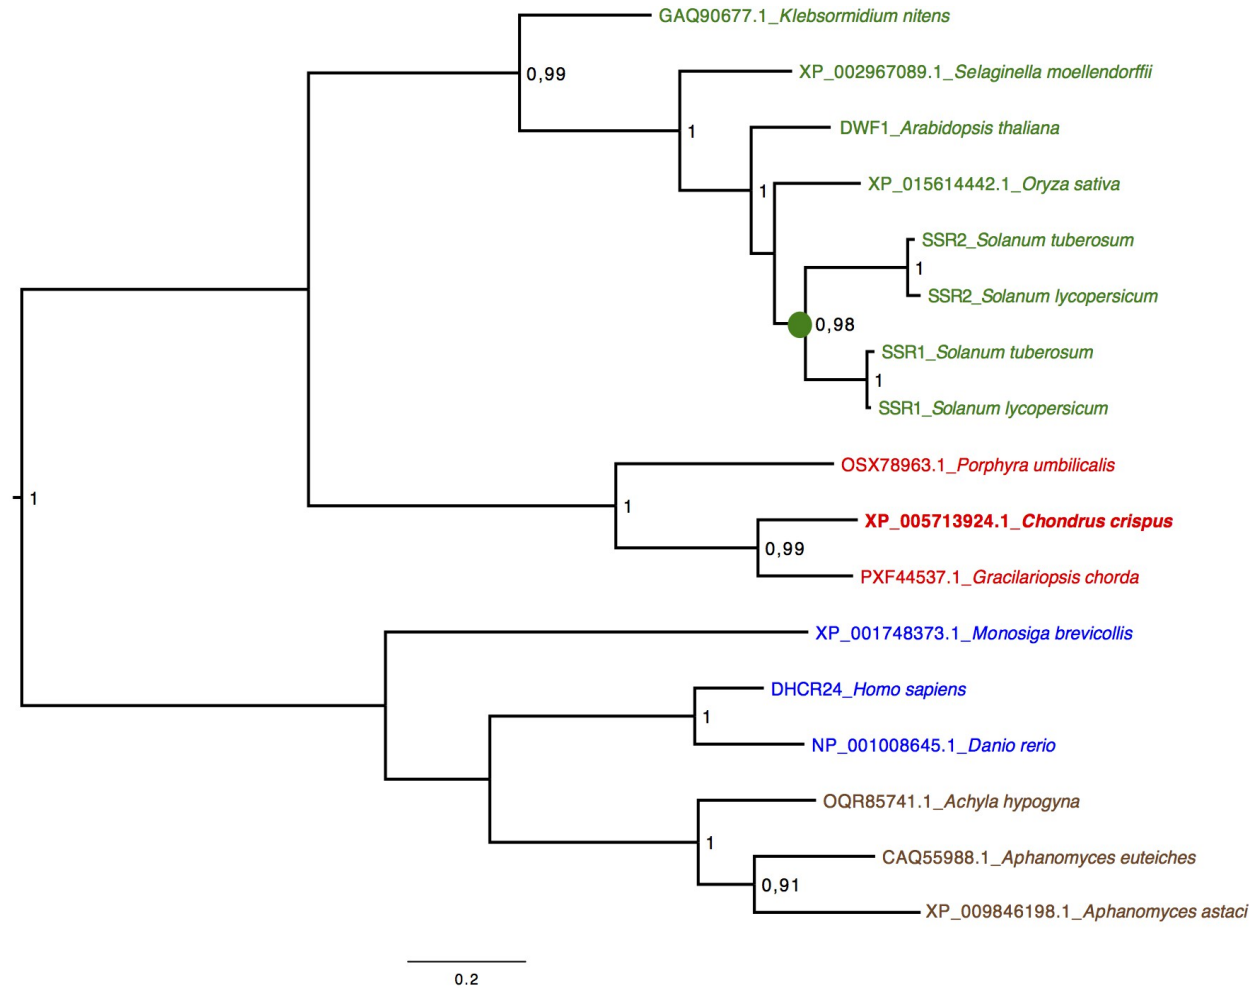

**Supp. Figure 3. Maximum-likelihood tree of eukaryotic side-chain reductases.** In green: sequences from green plants (streptophytes). The green dot indicates lineage-specific duplication in solanaceans. In red: sequences from red algae. In blue: sequences from opisthokonts (vertebrates + choanoflagellates). In brown: sequences from oomycete stramenopiles. Likelihood-ratio test values above 0.90 are indicated. Those above 0.97 are considered significant.

**Supplementary dataset S1.** New or edited protein sequences for the sterol synthesis pathway in *Chondrus crispus*.

>scaffold90:7511-6165(-) candidate squalene epoxidase

RDGRRVLCVERQLYAPSGALCAPPRIVGELLQPGGYDALCRLGLADALLDIDAQVIRGYA  
LFLGPRAERLPYHQPGGPDPAARPOPEGRAFHNGRFLKRLREIARAHPNV  
TLVEGNVLALLERDGAVVGVRYATRGKKAATAHAGLTIAC  
DGCGSALRKRAAAHHHVTVYSNFHGLVLHVPALPFPNHGHVVLADPCPVLFYPI SATEVR  
CLVDIPSTYAGDAAEYILHTVVPQVPPPLRAPLATAVRERRSKMMPNRVMPAPA  
HVVPGAVLLGD AFNMRHPLTGGGMTVALTDVELLRELLAPVPDLS DAPAVAAKLQLFYER  
RKPMSTTINILANALYTLFCATDDPALRDMRAACLDYLAKGGRMTHDPIAMLGGLKPQRH  
LLLAHFFAVALYGCGKALMPFPTPARLVRAWSIFRASFNIIKPLANAEGFWPLSWLPLNSL

>scaffold20:461442-460650(-) candidate squalene epoxidase

LCRLGLADALLHIDAQVIRGYALFLGPRAERLPYHQPGEPDPAARPOPEG  
RAFHNHGRFLKRLREIARAHPNVTLIEGNVLALLERDGAVV  
GVRYATRGKKAATAHAGLTIACDGCGSALRKRAAAHHHVTVYSNFHGLVLHVPALPFPNH  
GHVVLAHPCPVLFYPI SATEVRCLVDL  
YILHTVVPQVPPSLRAPLATTVRERRSKMMPNRVMPAPAHVVPGAVLLGD AFNMRHPLTG  
GGMTVALTDVELLRGLLAP

>scaffold57:152407-364140(+) candidate squalene epoxidase

RFAGPEHPSCGLKPQRHLLLAHFFAVALYGCGKALMPFPTPARPVRAWSIFRASFNFIK

PLANAEGFWPLSWLPLN  
LCRLGLADALLDIDAQVIRGYALFLGPRAERLPY  
LCRLGLADALLHIDAQVIRGYALFLGPRAERLPYHQGGPDPDPAARPQPEG  
RAFHNCRFLKRLREIARAHPNVTLIEGNVLALLERDGAVV  
GVRYATRGNKAATAHAGLTIACDGC GSALRKRAAAHHHVTVYSNFHGLVLHVPALPFPNH  
GHVVLAHPCPVLFYPI SATEVRCLVDL  
WSTYAGDAAEYILHTVVPQVPPSLRAPLATAVRERRSKMMPNRVMPAPAHVVP GAVLLGD  
AFNMRHPLTGGGMTVALTDVELLRGLLAP

>scaffold212:177405-176674(-) candidate C-4 sterol methyl oxidase

WDLPCRHTRAYPMFVVGCFASQLAGYFLGCAPFVLLDALRARSTPFRKI QPGKYAPRRAV  
FAAAAAMLR SFATVVLPLLAAGGLFI ERVGISRDAPFSPRVLLQVAYFFLVEDFLNYW  
VHRALHLPWLYTRVH SVHHEYDAPFAVVAAYAHPVEVVLQALPTFAGPLMLGPHLYTLCV  
WQLFRNWEAIDIHSGYDHA WGLASVLPWYAGPEHHDHFLHSGNFASVFTWCDWAYGTD  
LAYE

>CHC\_T00006492-3001 fusion of adjacent protein predictions CHC\_T00006492001 and CHC\_T00006493001;  
candidate sterol delta-7 reductase

MLGIAAWKGFIRYGLLYDHFGEVLAFLGKFALVVTVLLYFRGIYFPTNSDSGTT SFGIVWDMWHGTELHP  
EIFGVSLKQLVNCRFALMGWSVAIVAFACKQREQYGYVSN SMLVSVVLQLVYIFKFFVWEAGYFNSVSLD  
HSHVCLFWIYLRPLY  
MVGVGAI CCNYWTDKQREVFRATNGQVTI WGQKPV SIEAQYVTGDGKKRRSLL LASGWWGVS RHVNYVFE  
IALTFCWSVPAGGTGVI PYVYVMFLTILLTD RAYRDEVRCSEKYGKYEEYCRLVPYKMI PGVY



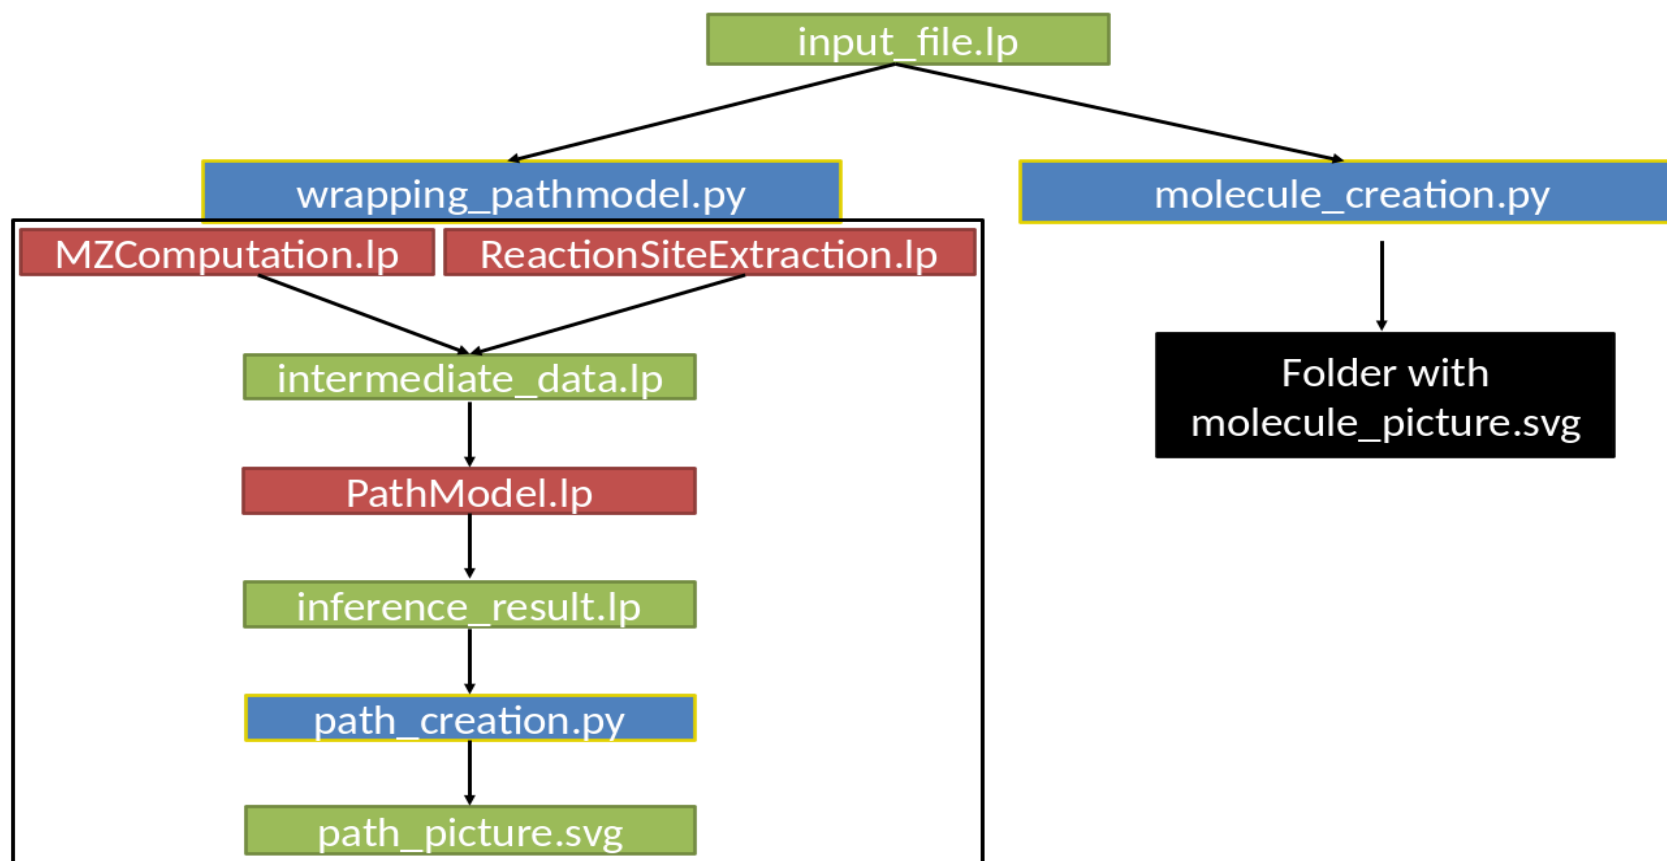

**Supp. Figure 4. Architecture of Pathmodel scripts.** In green: Data files, either input or result files. In red: ASP scripts. In blue: Python scripts. In black: folder containing results from molecule\_creation.py (molecule pictures). The black line shows the wrapping of all the scripts inside by wrapping\_pathmodel.py.

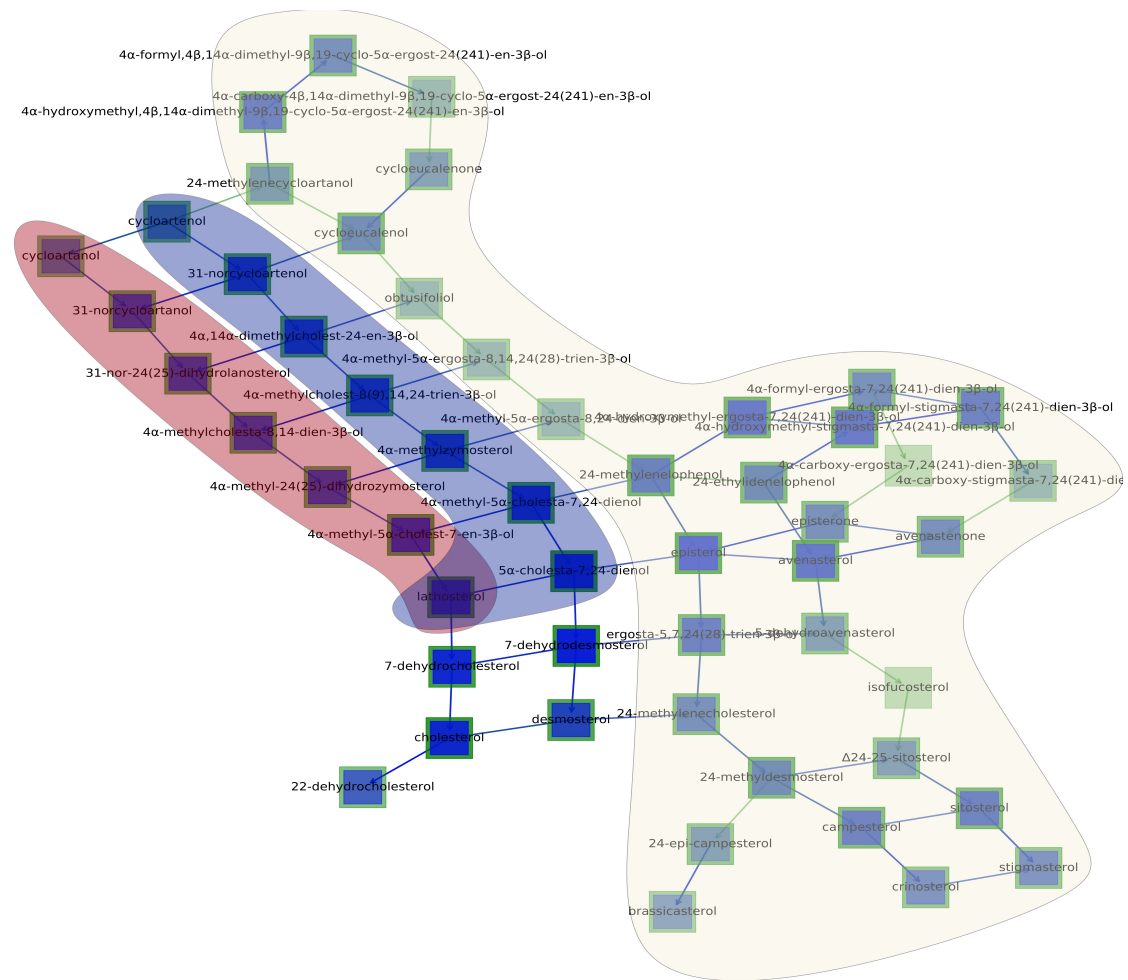

**Supp. Figure 5. Result of Pathmodel for sterol by path\_creation.py.** In white: reactions and metabolites from PWY-2541 (Metacyc). In red: Early SSR pathways. In blue: Late SSR pathways. Arrows in green are from PWY-2541 and arrows in blue are inferred by Pathmodel.

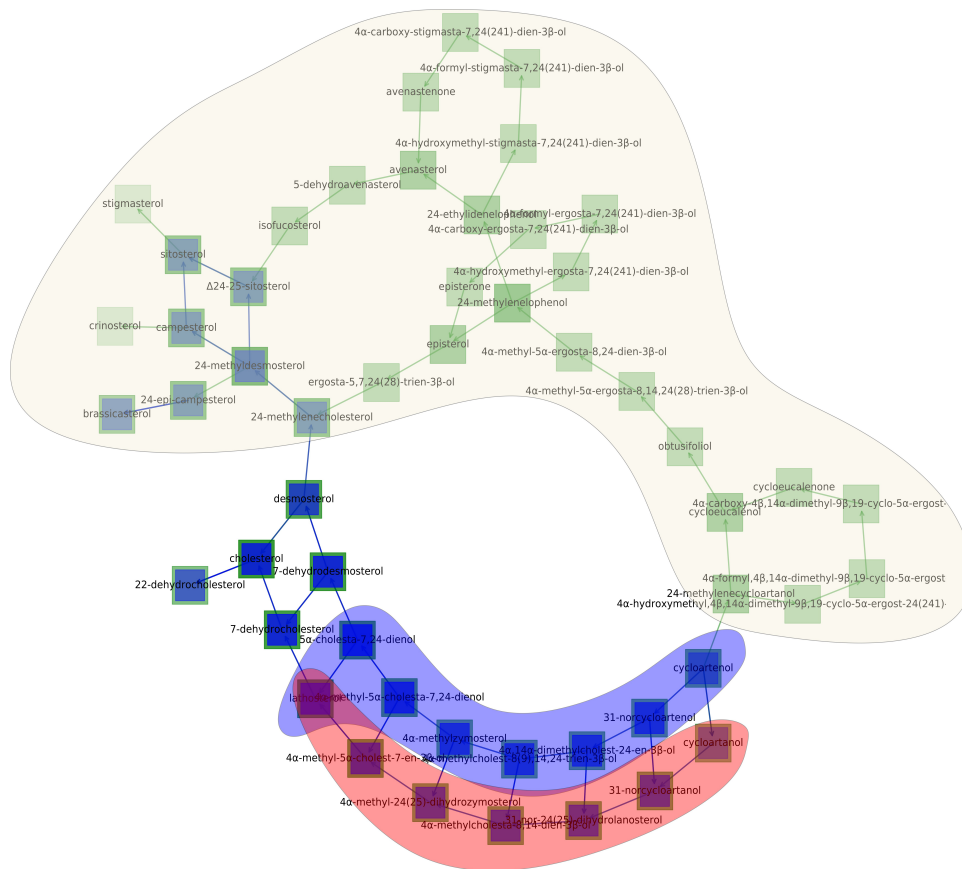

**Supp. Figure 6. Result of Pathmodel for sterol with path\_creation.py and absent molecules.** In white: reactions and metabolites from PWY-2541 (Metacyc). In red: Early SSR pathways. In blue: Late SSR pathways. Arrows in green are from PWY-2541 and arrows in blue are inferred by Pathmodel. In this example, we put all the metabolites of the PWY-2541 as absent molecules, so no inference was made on them.
